# Supplementary material for: Differential mobility and local variation in infection attack rate
Source: PubMed Central journal article supplement (PMC6358099; doi:10.1371/journal.pcbi.1006600), 2019-01-22
Supplement: pcbi.1006600.s001.pdf [file pcbi.1006600.s001.pdf]

| Model                   |             |            |               | Attack rate |        |        |            |             |
|-------------------------|-------------|------------|---------------|-------------|--------|--------|------------|-------------|
| $(R_0, \gamma, \alpha)$ | Population  | Grid       | Mobility ass. | Min.        | Max.   | Global | $CC_{pop}$ | $CC_{grad}$ |
| $(1.8, 1/2.6, 0.52)$    | Guangzhou   | 1km by 1km | DM            | 0.425       | 0.425  | 0.425  | 0          | 0           |
|                         |             |            | SM            | 0.3372      | 0.421  | 0.4576 | 0.7469     | 0.7347      |
|                         |             |            | IM            | 0.3261      | 0.9073 | 0.4077 | 0.7707     | 0.8816      |
|                         |             | 4km by 4km | DM            | 0.4576      | 0.4576 | 0.4576 | 0          | 0           |
|                         |             |            | SM            | 0.5523      | 0.7259 | 0.359  | 0.4214     | 0.4399      |
|                         |             |            | IM            | 0.3648      | 0.5384 | 0.4076 | -0.4651    | -0.6883     |
| $(1.8, 1/2.6, 1)$       | Guangzhou   | 1km by 1km | DM            | 0.425       | 0.425  | 0.425  | 0          | 0           |
|                         |             |            | SM            | 0.2909      | 0.6842 | 0.4316 | -0.5687    | -0.149      |
|                         |             |            | IM            | 0.0355      | 0.5029 | 0.3672 | 0.8213     | 0.5454      |
|                         |             | 4km by 4km | DM            | 0.4576      | 0.4576 | 0.4576 | 0          | 0           |
|                         |             |            | SM            | 0.318       | 0.6657 | 0.431  | 0.7668     | 0.768       |
|                         |             |            | IM            | -0.0415     | 0.5029 | 0.3687 | 0.5384     | 0.4076      |
| $(1.8, 1/2.6, .052)$    | Puerto Rico | 1km by 1km | DM            | 0.4251      | 0.4251 | 0.4251 | 0          | 0           |
|                         |             |            | SM            | 0.3598      | 0.4703 | 0.4231 | 0.6323     | 0.738       |
|                         |             |            | IM            | 0.3405      | 0.9935 | 0.4181 | -0.7915    | -0.8887     |
|                         |             | 4km by 4km | DM            | 0.4251      | 0.4251 | 0.4251 | 0          | 0           |
|                         |             |            | SM            | 0.3869      | 0.4591 | 0.4231 | 0.8866     | 0.5259      |
|                         |             |            | IM            | 0.3709      | 0.5932 | 0.4181 | 0.8193     | -0.8887     |
| $(4, 1/10, 0.52)$       | Puerto Rico | 1km by 1km | DM            | 0.912       | 0.912  | 0.912  | 0          | 0           |
|                         |             |            | SM            | 0.8683      | 0.9298 | 0.9111 | 0.6923     | 0.7631      |
|                         |             |            | IM            | 0.8615      | 1      | 0.9072 | -0.7528    | -0.9008     |
|                         |             | 4km by 4km | DM            | 0.912       | 0.912  | 0.912  | 0          | 0           |
|                         |             |            | SM            | 0.8851      | 0.9248 | 0.9111 | 0.8805     | 0.4554      |
|                         |             |            | IM            | 0.8809      | 0.98   | 0.9072 | 0.864      | -0.2702     |

Table 1: Summary statistics for different model parameters, populations and mobility assumptions. Results for different grid sizes involve aggregation of result obtained at 1km by 1km resolution. In all cases, empty pixels are omitted from calculations. It is therefore possible to obtain a smaller minimum value of attack rate after aggregation.
