# Supplementary material for: Differential mobility and local variation in infection attack rate
Source: PubMed Central journal article supplement (PMC6358099; doi:10.1371/journal.pcbi.1006600), 2019-01-22
Supplement: pcbi.1006600.s009.pdf [file pcbi.1006600.s009.pdf]

# 1 S1 Protocol: Additional algebraic analyses

## 2 Uniform local attack rates for dual mobility assumptions

3 Citations in this document refer to the References section of the main document.

4 To show uniformity of attack rate with respect to space, we construct the final size equation for  
 5 the system. If the final size for age-group  $a$  in location  $i$  is given by  $z_{a,i} = R_{a,i}/N_i$ , then

$$\int_0^\infty \frac{\dot{S}_{a,i}}{S_{a,i}} dt = -\beta \sum_{b,j} L_{(a,i)(c,k)}^D \int_0^\infty \frac{I_{c,k}}{N_k} \quad (1)$$

$$\text{where } L_{(a,i)(c,k)} = K_{ij} \delta_{ab} \frac{\sum_{c,k} K_{jk}^T C_{bc} N_k}{\sum_{d,l} K_{jl}^T N_{(d,l)}} \quad (2)$$

$$= K_{ij} \delta_{ab} \frac{\sum_k K_{jk}^T N_k \sum_c C_{bc}}{\sum_l K_{jl}^T N_l} \quad (3)$$

$$\text{so } \log(1 - z_{a,i}) - \log\left(\frac{N_{a,i}}{N_i}\right) = -\frac{\beta}{\gamma} \sum_{b,j} L_{(a,i)(c,k)}^D z_{c,k} \quad (4)$$

6 As reasoned in Ref [35] (for the S-mobility FOI with denominator  $N_i$ , and in the absence of  
 7 age-mixing), if there exists a solution  $\mathbf{z}$  such that  $z_{a,i} = x_a$ , i.e. final sizes are independent of  
 8 space, then we have:

$$\log(1 - z_{a,i}) - \log\left(\frac{N_{a,i}}{N_i}\right) = -\beta \sum_{b,j} K_{ij} \delta_{ab} \frac{\sum_k K_{jk}^T N_k}{\sum_l K_{jl}^T N_l} \sum_c C_{bc} x_c \quad (5)$$

$$= -\beta \sum_j K_{ij} \sum_c C_{ac} x_c \quad (6)$$

$$= -\beta \sum_c C_{a,c} x_c \quad (7)$$

9 If the distribution of age-groups is uniform in space, then we have  $N_{a,i}/N_i = q_a$ , and so, if  
 10 there exists a solution to the age-only final size equation:

$$\log(1 - \mathbf{x}) - \log \mathbf{q} = -\beta C \mathbf{x} \quad (8)$$

11 then  $z_{a,i} = x_a$  is a solution to equation (4), and final sizes are uniform in space.

12 **Relationship to other approximations in the literature**

13 It is shown in [35] that susceptible-only mobility induces uniformity of attack rate, using a FOI  
 14 with normalization by native population. In fact, we can show that uniformity is guaranteed  
 15 only when all agents are equally mobile, owing to denominator in the force of infection term,  
 16 which must be corrected to account for spatial mobility within the whole population.

17 For ease of notation, the following formulae are presented without explicit reference to  
 18 age-mixing, but this is always included in computational results (c.f. methods for age-explicit  
 19 formulae). The dual mobility FOI assumes that all agents are fully mobile as described by the  
 20 kernel  $K$  (a stochastic matrix). The dual mobility FOI on an agent resident in pixel  $i$  is given  
 21 by

$$\lambda_i^D = \beta \sum_j K_{ij} \frac{\sum_k K_{jk}^T I_k}{M_j} \quad (9)$$

$$M_j = \sum_l K_{jl}^T N_l \quad (10)$$

22 where  $M_j$  denotes the total population present in pixel  $j$ . Crucially, when a model incorporates  
 23 spatial mobility, we can not say  $M_j = N_j$ . This FOI assumes frequency-dependent  
 24 transmission based on constant contacts, and describes the expected dynamics in an  
 25 agent-based system with explicit travel determined by  $K$ .

26 In the literature, the S- and I-mobility kernels are typically denoted as follows:

$$\lambda_i^S = \beta \sum_j K_{ij} \frac{I_j}{N_j} \quad (11)$$

$$\lambda_i^I = \beta \sum_j K_{ij}^T \frac{I_j}{N_i} \quad (12)$$

27 We claim that the denominators  $N_j$  and  $N_i$  do not accurately represent the population present  
 28 in pixels  $j$  and  $i$  respectively in high resolution gridded models, owing to spatial mobility. The  
 29 argument below shows that the classic IM FOI serves as at least as a good approximation when  
 30 incidence is small, but the SM FOI does not.

31 Using the above equations, SM and DM both induce uniform cumulative attack rates in space.

32 The real SM FOI is significantly different to equation (11) in a way that is described by the  
 33 ratio of total time spent in each pixel and the native population of that pixel.

34 Consider deriving the S-mobility and I-mobility FOIs from the dual mobility FOI. This  
 35 involves starting with equation (9) and replacing either the single appearance of  $K$  or the  
 36 single appearance of  $K^T$  with the identity matrix (denoted  $E$  to avoid confusion with the  $I_i$ ),  
 37 and adjusting denominators  $M_j$  accordingly:

$$\lambda_i^S = \beta \sum_j K_{ij} \frac{\sum_k E_{jk}^T I_k}{I_j + \sum_l K_{jl}^T (N_l - I_l)} \quad (13)$$

$$= \beta \sum_j K_{ij} \frac{I_j}{I_j + \sum_l K_{jl}^T (N_l - I_l)} \quad (14)$$

$$\approx \beta \sum_j K_{ij} \frac{I_j}{\sum_l K_{jl}^T N_l} \quad (\text{first approximation}) \quad (15)$$

$$\approx \beta \sum_j K_{ij} \frac{I_j}{N_j} \quad (\text{second approximation}) \quad (16)$$

$$\lambda_i^I = \beta \sum_j E_{ij} \frac{\sum_k K_{jk}^T I_k}{N_j - I_j + \sum_l K_{jl}^T I_l} \quad (17)$$

$$= \beta \frac{\sum_k K_{ik}^T I_k}{N_i - I_i + \sum_l K_{jl}^T I_l} \quad (18)$$

$$\approx \beta \sum_j K_{ij}^T \frac{I_j}{N_i} \quad (19)$$

38 The denominator in equation (14) is not  $N_j$  (the native population of pixel  $j$ ) but is instead the  
 39 population *present in pixel  $j$*  according to  $K$ , when only the non-infectious population is  
 40 mobile. In the case where this is equal to the native population of pixel  $j$ , we have uniformity  
 41 of attack rates, as seen in the literature (using a similar argument to our proof that the DM FOI  
 42 induces uniform attack rates).

43 The denominator in equation (15) is that of the dual mobility assumption. This approximation  
 44 is valid prevalence is low, i.e.  $I_i \ll N_i \forall i$ , and the absence of dynamic quantities in the  
 45 denominator yields analytic tractability and faster simulation.

46 The denominator in equation (16) is simply the native population of that pixel, thus yielding  
 47 uniform attack rates. This assumption is equivalent to the assumption that the total number of

48 people leaving each pixel is the same as the total number of people arriving in each pixel, i.e.  
 49 that the matrix  $K^T$  is also stochastic.

50 This is a weaker assumption but is related to the  $N_i \rightarrow \infty$  approximation used in [36]. When  
 51 using the full FOI terms for S- and I-mobility, the only case in which these conventional  
 52 mobility assumptions induce uniformity of attack rate is when each location is equally visited  
 53 (in mathematical terms, uniformity of total contact means that the spatial kernel is a stochastic  
 54 matrix, and the latter requirement is equivalent to the transpose of  $K$  also being stochastic,  
 55 hence  $K$  is orthogonal). The notion of normalization by total population present is not new to  
 56 the literature [37], though is often excluded in the construction of spatial epidemic models.

### 57 **Convoluting kernel formulations**

58 It is possible to change the mobility assumption in an existing model via an effective or  
 59 convoluted kernel  $L$  such that replacing  $K$  with  $L$  in a given explicit FOI is equivalent to a  
 60 change of mobility assumption. In fact, we can write any spatially explicit FOI in the form:

$$\lambda_i = \beta \sum_j L_{ik} \frac{I_k}{N_k}$$

61 for some matrix  $L$ . This formulation is essential in final size calculations. Then, for example,  
 62 the convoluted D-mobility kernel  $L^D$  is given by  $L_{ik}^D = \sum_j K_{ij} K_{jk}^T N_j / M_j$ , where  
 63  $M_j = \sum_l K_{jl} N_l$ , as in the main text. When using low-prevalence approximations, this can be  
 64 done prior to numerical simulation, and so requires minimal additional modification to existing  
 65 model codes. Note that this representation of FOI is structurally equivalent to the S-mobility  
 66 second approximation given in equation (16), though the effective travel kernel  $L$  is now  
 67 non-isotropic.

### 68 **Global transmissibility coefficient**

69 In all simulations, we use the next generation matrix (NGM) method to derive a global  
 70 transmissibility parameter  $\beta$  that yields our desired global  $R_0$ . NGMs are derived from  $\lambda_i$ ,  
 71 evaluated at disease-free equilibrium (DFE). We can show that, in all 3 cases, using the  
 72 approximations to S- and I-mobility given in equations (15) and (19) the value of  $\beta$  obtained is

73 equal to that of the spatially heterogeneous system, maintaining heterogeneity in age only.

74 In the I-mobility case, the NGM is given by

$$G_{(a,i)(b,j)}^I = \frac{\beta}{\gamma} \frac{N_{(a,i)}}{N_i} C_{ab} K_{ij}^T \quad (20)$$

75 Since  $K$  is a stochastic matrix, we have  $\lambda_1(K) = 1$  and so  $\lambda_1(K^T) = 1$ , thus the dominant  
76 eigenvalue of  $G^I$  is equal to the dominant eigenvalue of

$$G_{ab}^{age} = \frac{\beta}{\gamma} \frac{N_a}{N_{total}} C_{ab} \quad (21)$$

77 Using S-mobility, we have

$$G_{(a,i)(c,k)}^S = \frac{\beta}{\gamma} N_{a,i} C_{ac} K_{ik} \frac{1}{\sum_{d,l} K_{kl}^T N_{(d,l)}} \quad (22)$$

$$= \frac{\beta}{\gamma} C_{ac} \frac{K_{ki}^T N_{a,i}}{\sum_{d,l} K_{kl}^T N_{(d,l)}} \quad (23)$$

$$= \frac{\beta}{\gamma} C_{ac} X_{(a,i),(c,k)} \quad (24)$$

$$\text{where } X_{(a,i)(c,k)} : = \frac{K_{ki}^T N_{a,i}}{\sum_{d,l} K_{kl}^T N_{(d,l)}} \quad (25)$$

78 Note that  $X$  is a stochastic matrix, and so the dominant eigenvalue of  $G^S$  is equal to the  
79 dominant eigenvalue of  $G^{age}$ .

80 A similar argument applies to dual mobility, where we have

$$G_{(a,i)(c,k)}^D = \frac{\beta}{\gamma} N_{a,i} C_{ac} \sum_j K_{ij} \frac{K_{jk}^T}{\sum_{d,l} K_{kl}^T N_{(d,l)}} \quad (26)$$

$$= \frac{\beta}{\gamma} C_{ac} \sum_j K_{kj} \frac{K_{ji}^T N_{a,i}}{\sum_{d,l} K_{kl}^T N_{(d,l)}} \quad (27)$$

$$= \frac{\beta}{\gamma} C_{ac} Y_{(a,i),(c,k)} \quad (28)$$

$$\text{where } Y_{(a,i)(c,k)} : = \sum_j K_{kj} \frac{K_{ji}^T N_{a,i}}{\sum_{d,l} K_{kl}^T N_{(d,l)}} \quad (29)$$

81 Here, since  $Y$  is the product of 2 stochastic matrices, it must itself be stochastic, and so the

82 dominant eigenvalue of  $G^D$  is also equal to the dominant eigenvalue of  $G^{age}$ .

83 The arguments presented above for susceptible-only and dual mobility require that the same  
84 travel kernel  $K$  be used to describe the movement of all age groups, i.e.  $K_{ij}$  be independent of  
85  $a, b, c, d$ . It can be verified computationally that age-dependent mobility can indeed induce  
86 different values of  $\beta$  to the spatially heterogeneous model, in all cases other than pure  
87 infectious-only mobility. We reserve a detailed analysis of this scenario for a subsequent study.
